# Supplementary material for: Transcriptional and Metabolomic Analyses Indicate that Cell Wall Properties are Associated with Drought Tolerance in Brachypodium distachyon
Source: MDPI journal article supplement (doi:10.3390/ijms20071758), 2019-04-10
Supplement: s1 [file s1]

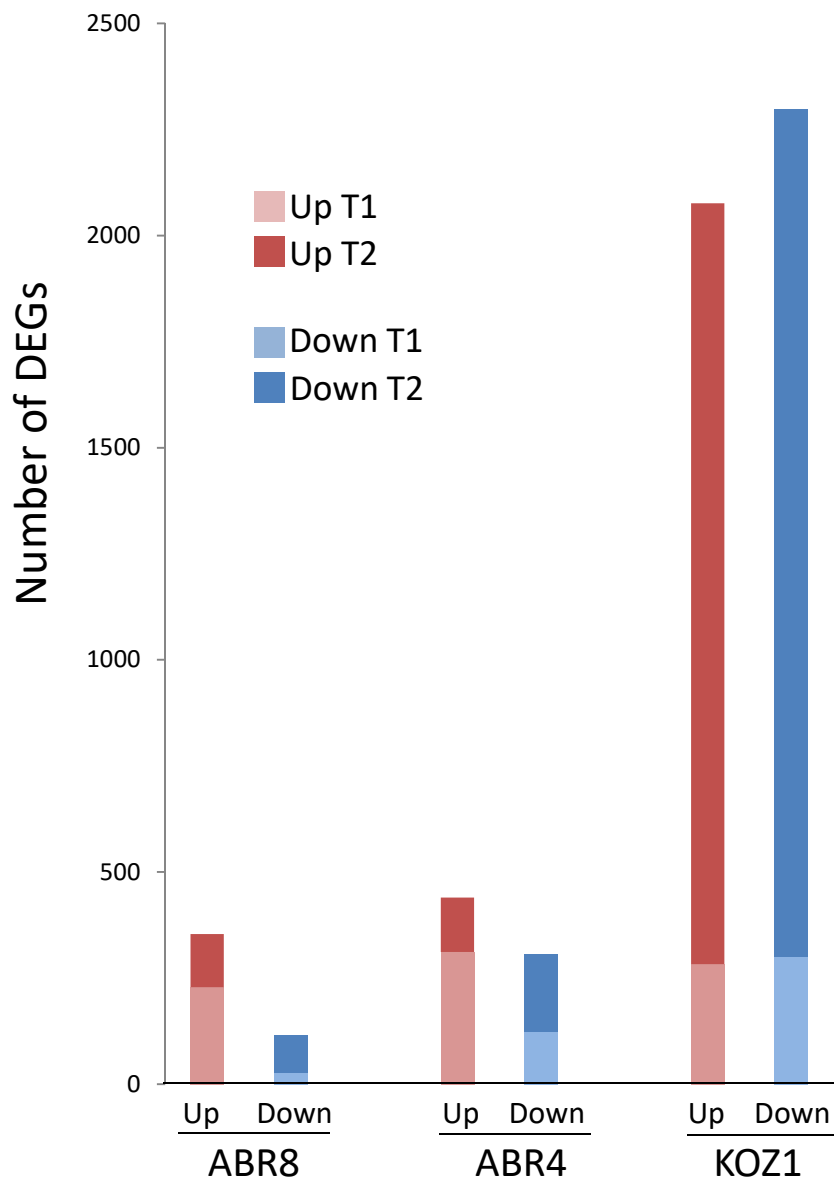

**Figure S1.** Bar graph depicting the number of differentially expressed genes (DEGs) in the three *Brachypodium distachyon* genotypes (ABR4, ABR8 and KOZ1) in response to drought stress after 4 days (T1) and 8 days (T2) of withholding water. For each time point the number of genes with > 2-fold change in expression is shown.

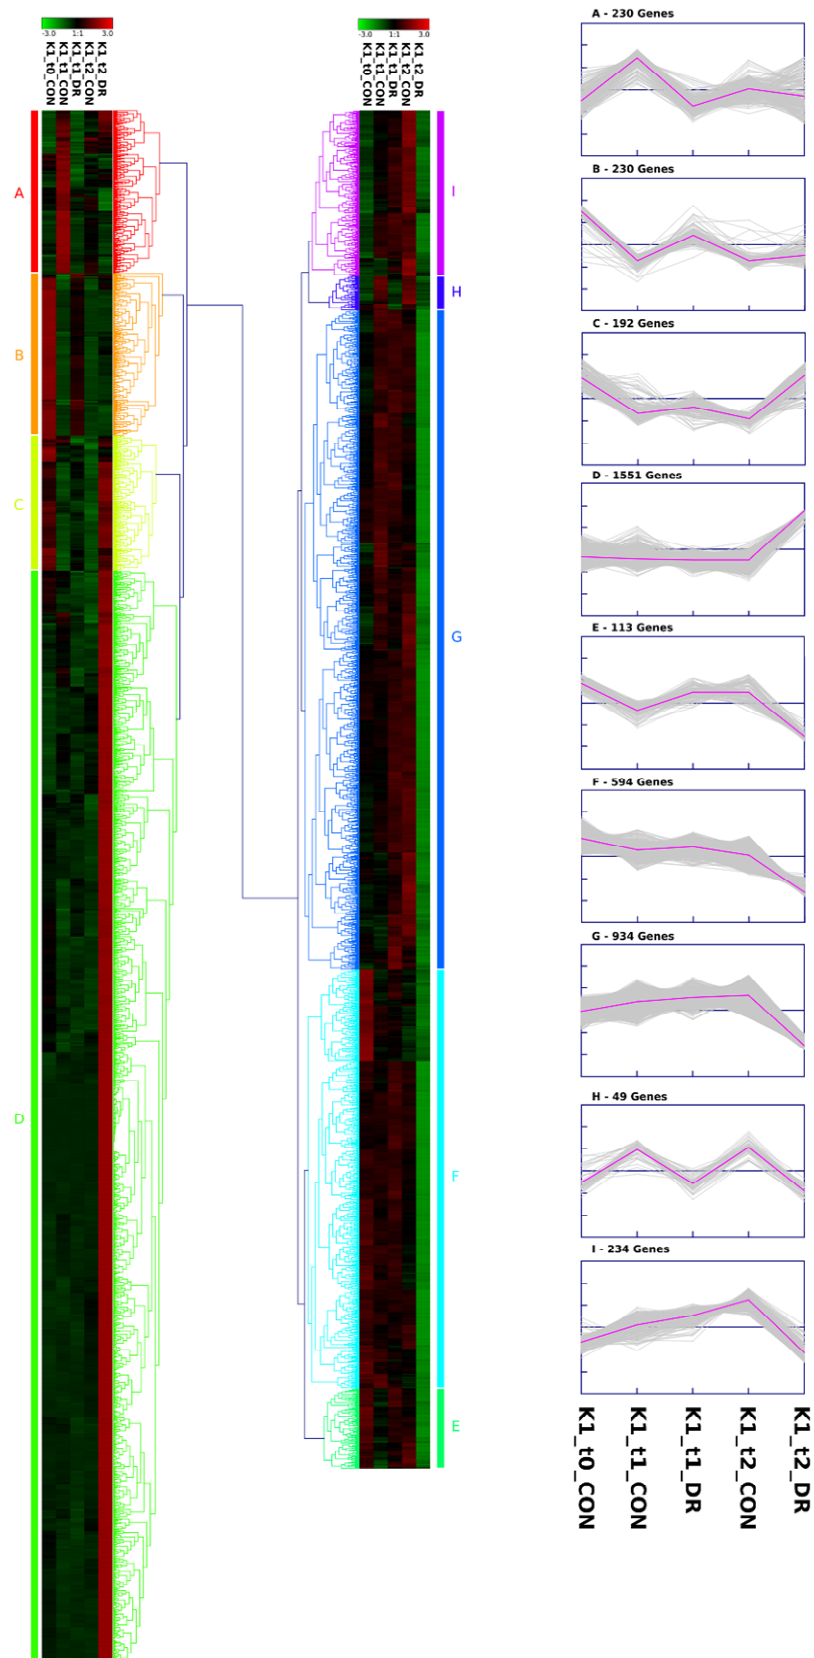

**Figure S2.** Heat map and cluster results for genes >2 fold differentially expressed between controlled and treated conditions for KOZ1 (4127 genes) at either T1 or T2. Heat map and clustering was created using complete-linkage hierarchical clustering with the Genesis program (Sturn et al., 2002).

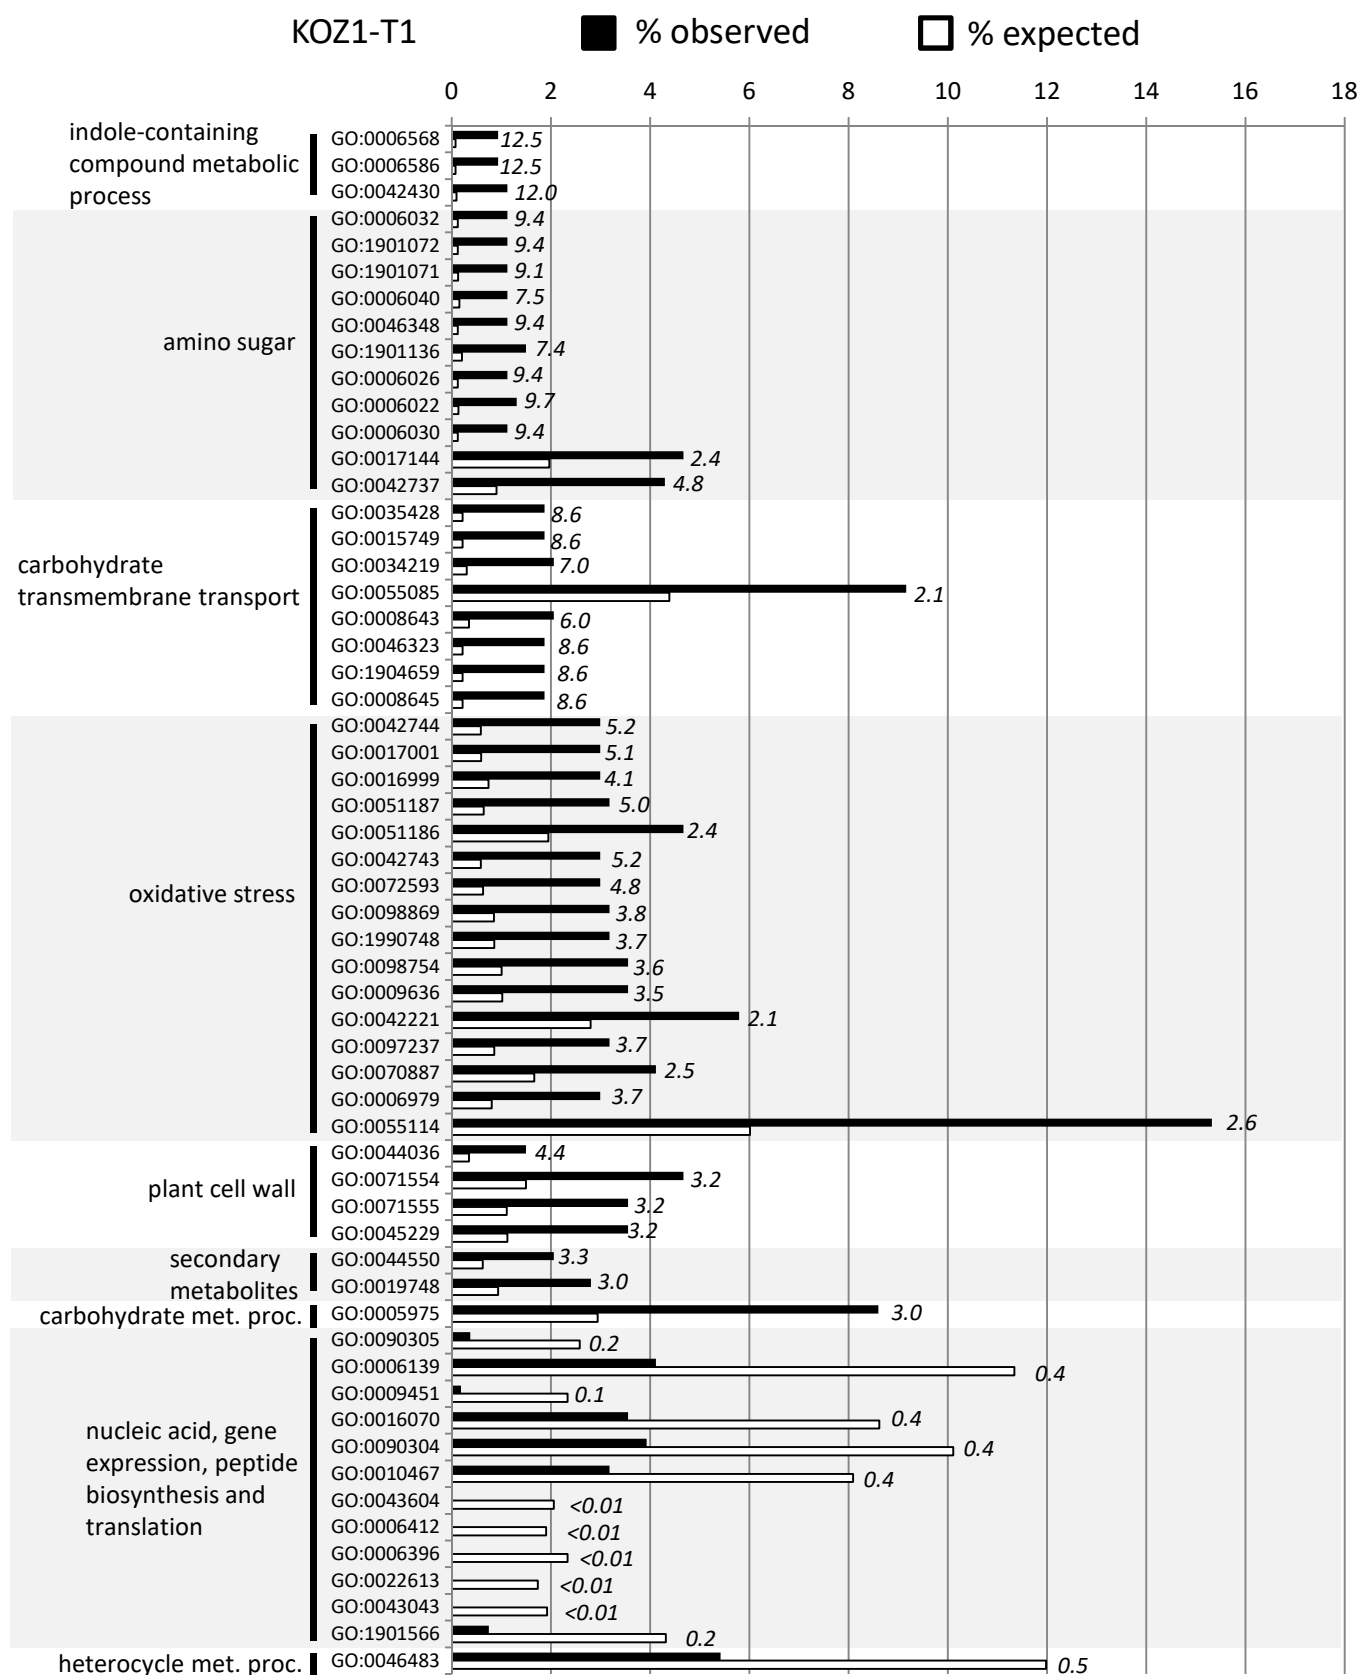

**Figure S3.** GO term enrichment analysis ( $p < 0.05$  FDR corrected) for biological processes of genes  $>2$  fold up or down-regulated in KOZ1-T1. For each GO term, the expected (white bars) and the observed (black bars) percentage is presented. Numbers in italics indicate the fold enrichment. Only GO-terms with more than 2-fold enrichment or depletion are shown.

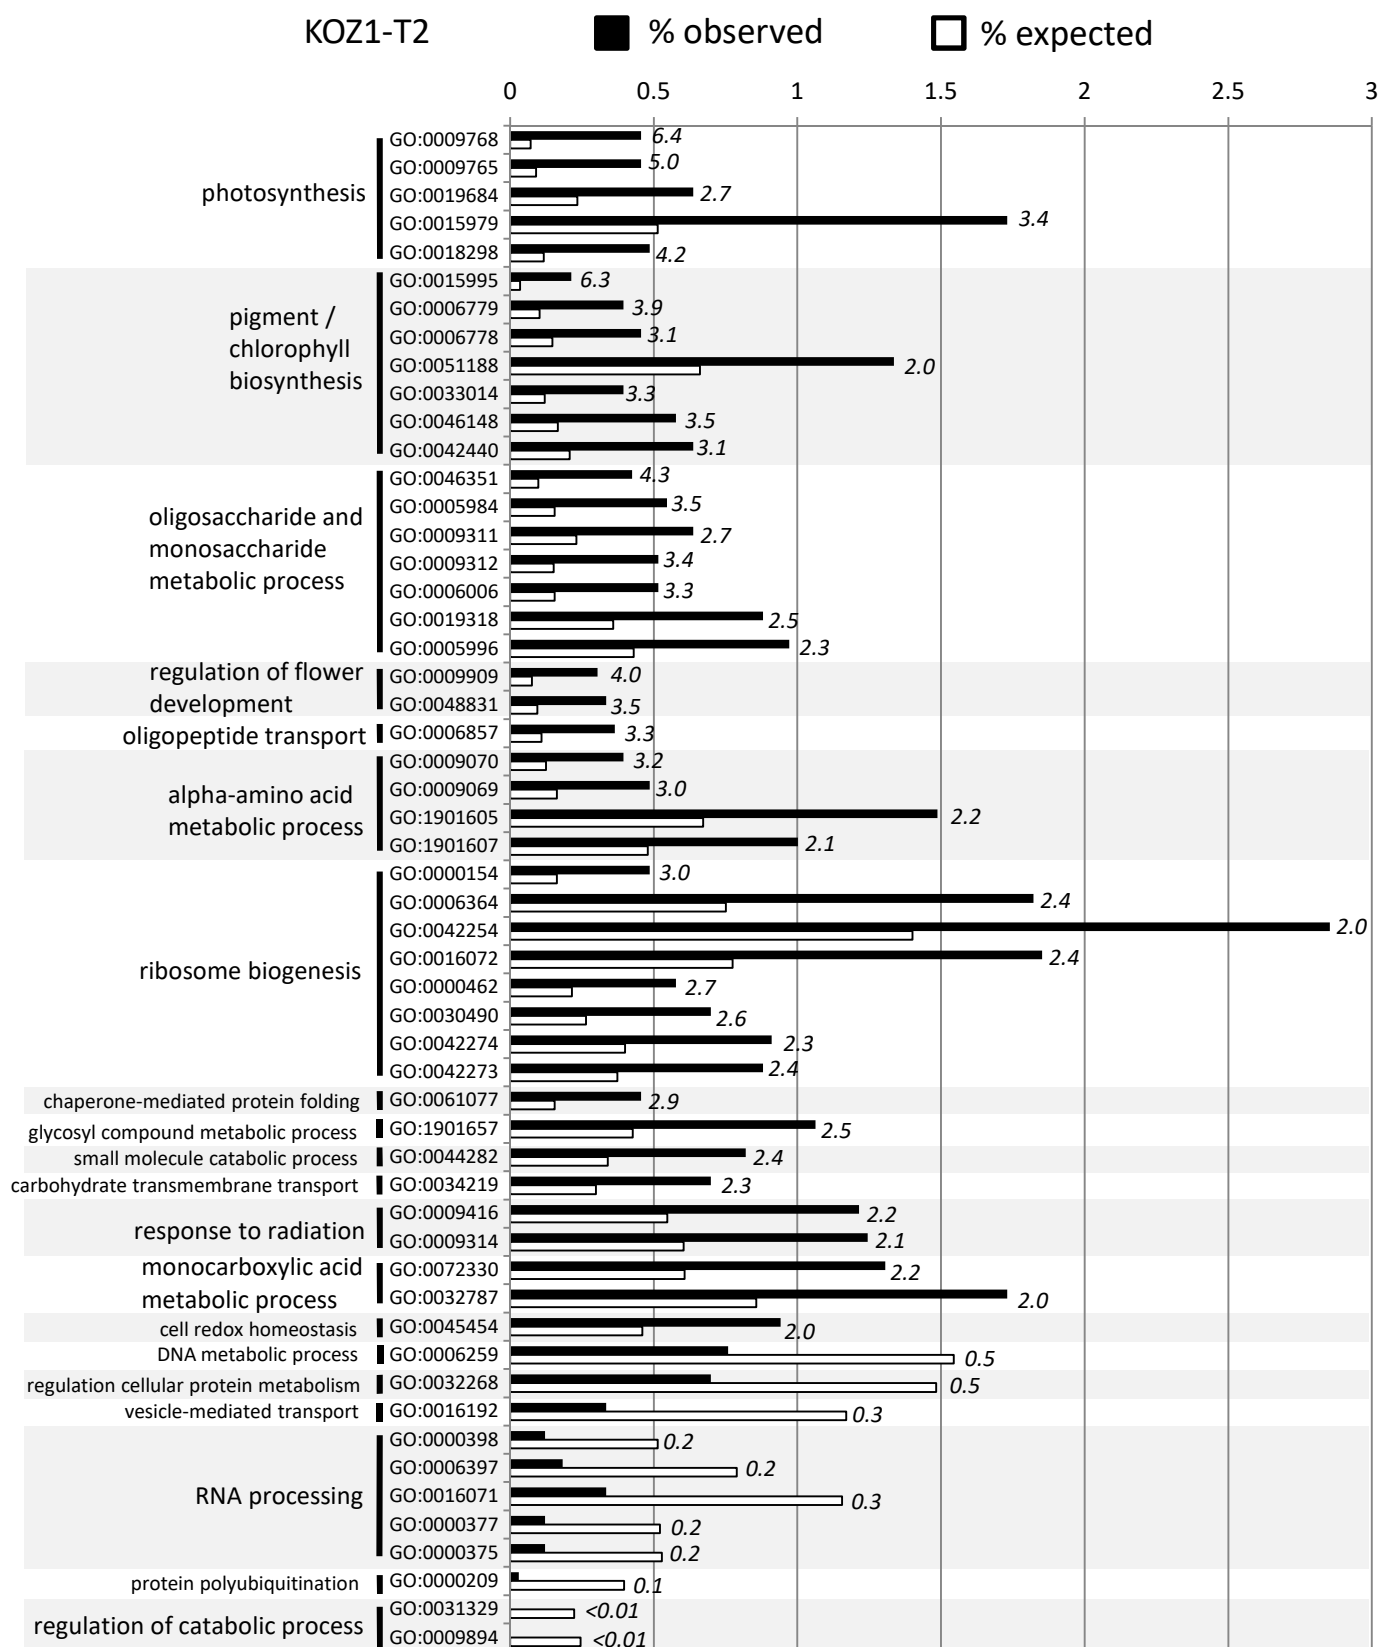

**Figure S4.** GO term enrichment analysis ( $p < 0.05$  FDR corrected) for biological processes of genes  $>2$  fold up or down-regulated in KOZ1-T2. For each GO term, the expected (white bars) and the observed (black bars) percentage is presented. Numbers in italics indicate the fold enrichment. Only GO-terms with more than 2-fold enrichment or depletion are shown.

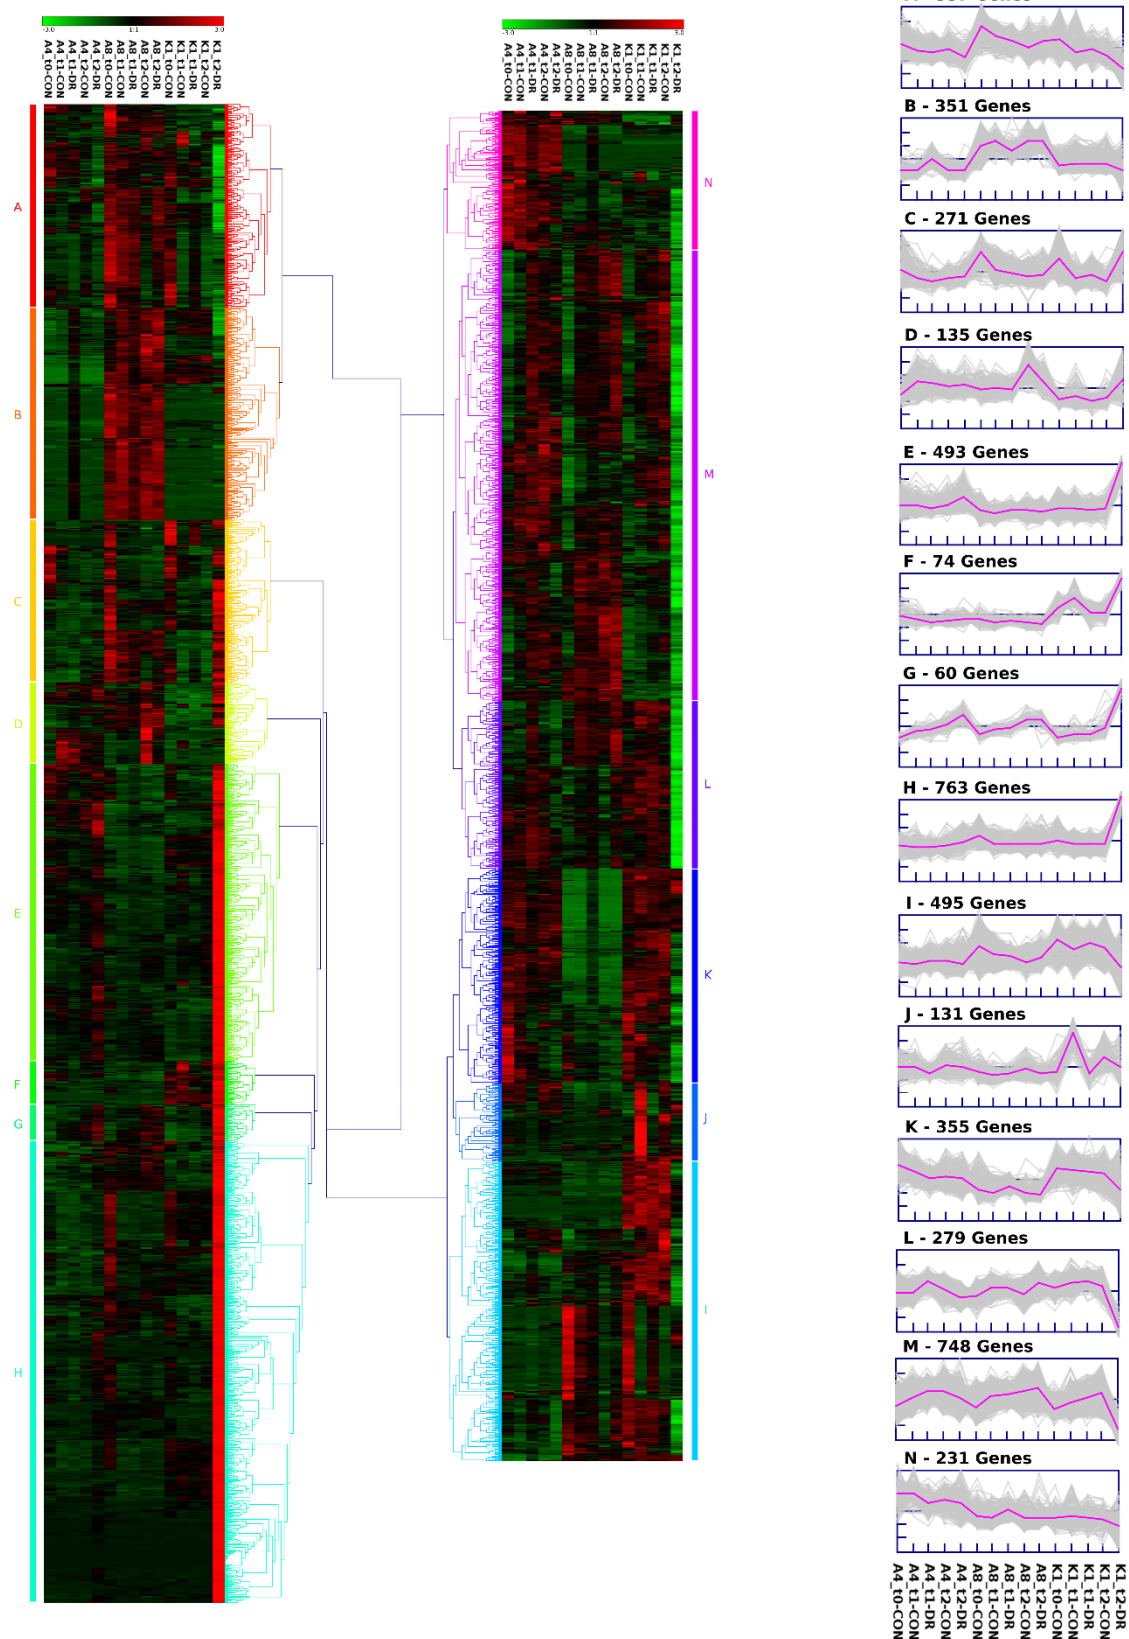

**Figure S5.** Heat map and cluster results for all of the genes >2 fold differentially expressed between controlled and treated conditions in the drought experiment (total 4723 genes). Heat map and clustering created using complete-linkage hierarchical clustering with the Genesis program (Sturn et al., 2002).

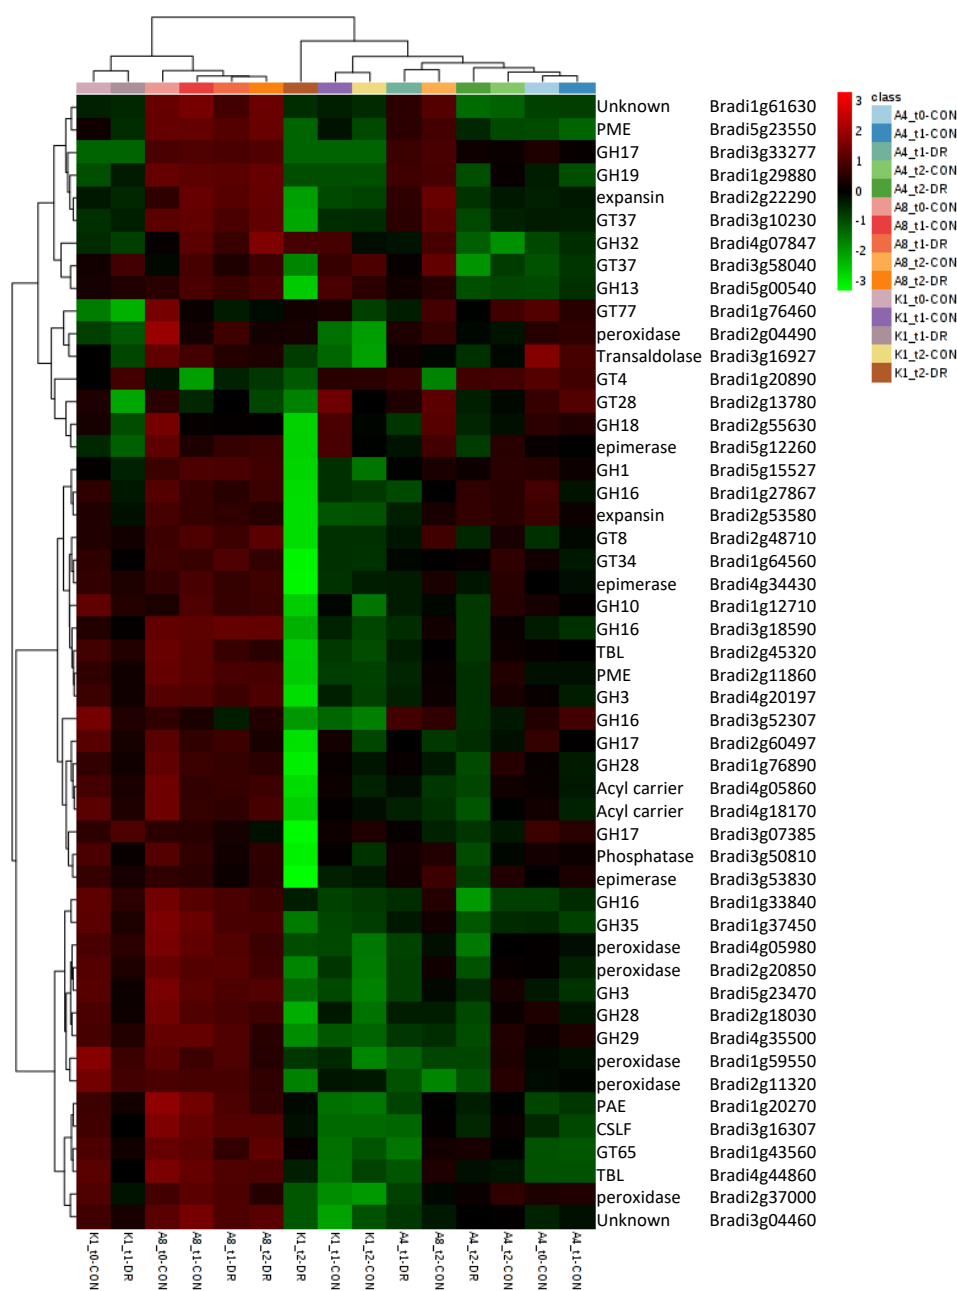

**Figure S6.** Dendrogram and heat map of the expression levels for 50 genes associated with clusters A+B of the hierarchical cluster analyses for all the genes showing >2-fold differential expression across the samples (see Table S6 for a more detailed description). Abbreviations: A4, ABR4; A8, ABR8; K1, KOZ1; CON, control; DR, drought; GH, glycoside hydrolase; GT, glycosyl transferase; PME, pectin methylesterase; PAE, pectin acetylerase; TBL, trichome birefringence-like, CSLF, cellulose synthase-like F.

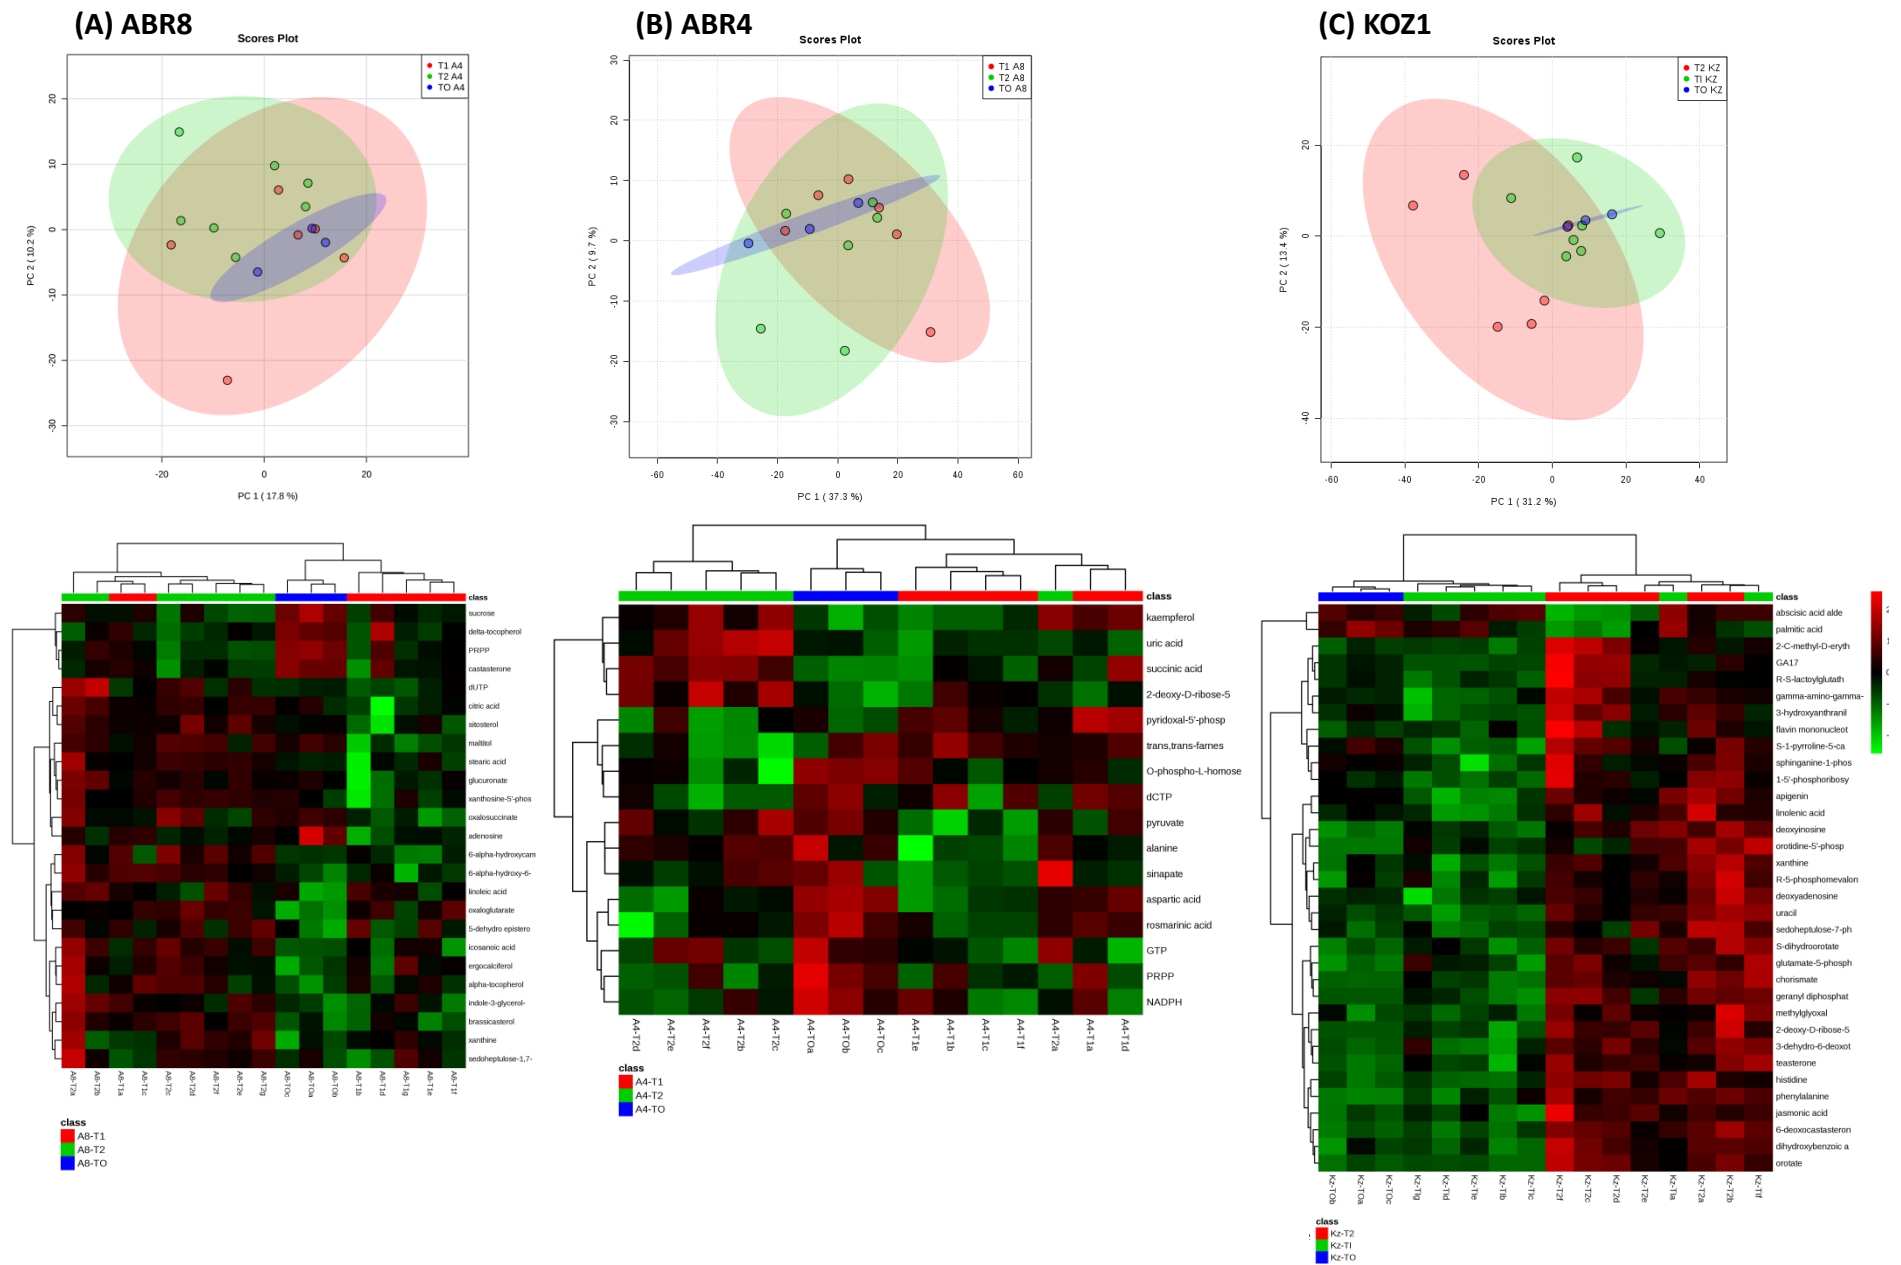

**Figure S7.** Principal Component Analysis of metabolite profiles in the three *Brachypodium distachyon* genotypes **(A)** ABR8 [A8], **(B)** ABR4 [A4] and **(C)** KOZ1[KZ]) in response to drought stress after 4 days (T1) and 8 days (T2) of with-holding water compared to well-watered controls (T0). Also shown as heat maps are significant metabolite changes (P<0.05; FDR<0.05) for each genotype .

### (A) ABR8

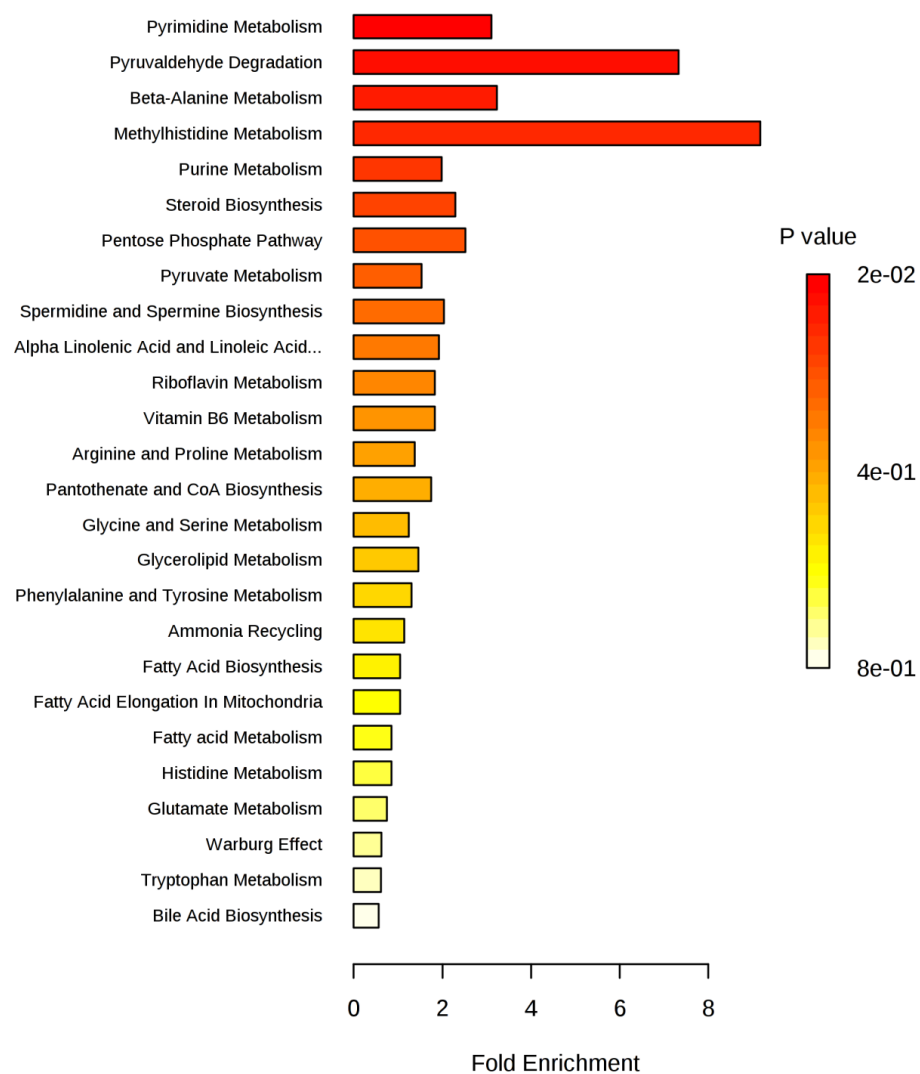

| Pathway                                           | Hits | P value | Holm P | FDR |
|---------------------------------------------------|------|---------|--------|-----|
| Purine Metabolism                                 | 4/74 | 0.0502  | 1      | 1   |
| Starch and Sucrose Metabolism                     | 2/31 | 0.12    | 1      | 1   |
| Glutamate Metabolism                              | 2/49 | 0.248   | 1      | 1   |
| Alpha Linolenic Acid and Linoleic Acid Metabolism | 1/19 | 0.315   | 1      | 1   |

**Figure S8.** Enriched pathways in the three *Brachypodium distachyon* genotypes **(A)** ABR8 [A8], **(B)** ABR4 [A4] and **(C)** KOZ1[KZ] in response to drought stress. Tables with significance levels for each genotype are provided for each pathway.



(B) ABR4

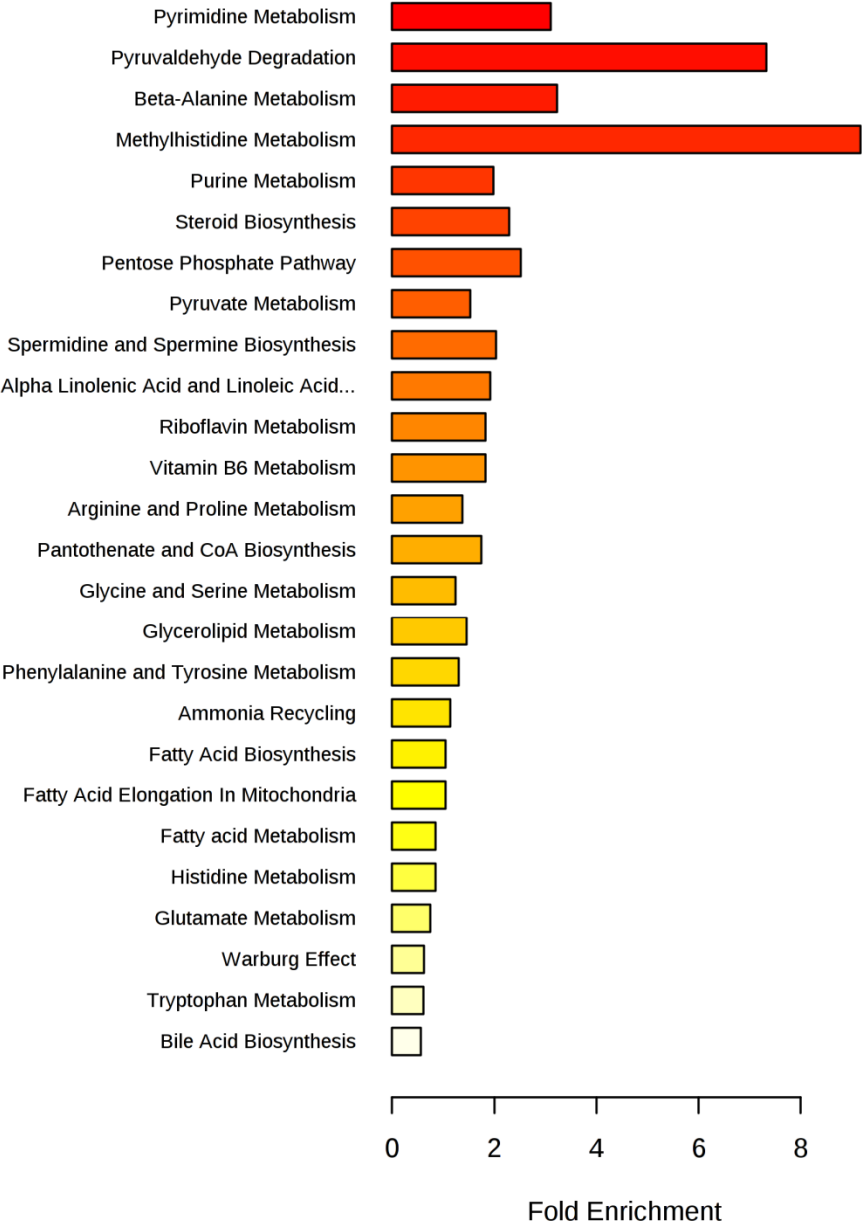

| Pathway                                     | Hits | P value  | Holm P   | FDR      |
|---------------------------------------------|------|----------|----------|----------|
| Glutamate Metabolism                        | 7/49 | 3.07E-06 | 3.01E-04 | 3.01E-04 |
| Glucose-Alanine Cycle                       | 4/13 | 2.62E-05 | 0.00254  | 0.00129  |
| Urea Cycle                                  | 4/29 | 7.48E-04 | 0.0718   | 0.0244   |
| Alanine Metabolism                          | 3/17 | 0.00187  | 0.177    | 0.0457   |
| Purine Metabolism                           | 5/74 | 0.00401  | 0.377    | 0.0786   |
| Arginine and Proline Metabolism             | 4/53 | 0.00733  | 0.682    | 0.105    |
| Pentose Phosphate Pathway                   | 3/29 | 0.00893  | 0.822    | 0.105    |
| Malate-Aspartate Shuttle                    | 2/10 | 0.00958  | 0.872    | 0.105    |
| Citric Acid Cycle                           | 3/32 | 0.0118   | 1        | 0.105    |
| Beta-Alanine Metabolism                     | 3/34 | 0.0139   | 1        | 0.114    |
| Aspartate Metabolism                        | 3/35 | 0.0151   | 1        | 0.114    |
| Pyruvate Metabolism                         | 3/48 | 0.0352   | 1        | 0.247    |
| Glutathione Metabolism                      | 2/21 | 0.0404   | 1        | 0.254    |
| Transfer of Acetyl Groups into Mitochondria | 2/22 | 0.0441   | 1        | 0.254    |

(C) KOZ1

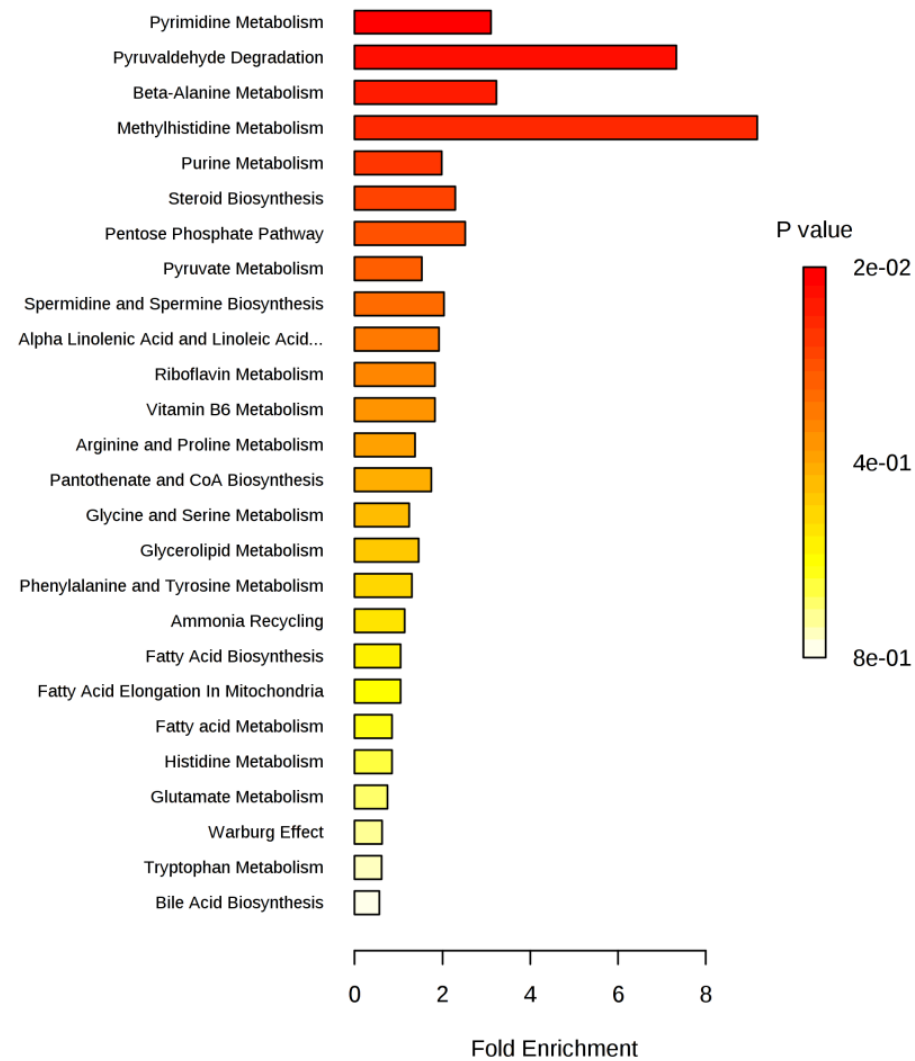

| Pathway          | Hits | P value | Holm P  | FDR      |
|------------------|------|---------|---------|----------|
| Brassinosteroids | 3/9  | 0.00101 | 0.08459 | 3.01E-04 |
| Pyrimidines      | 4/39 | 0.01337 | 1       | 0.00129  |
| Purines          | 4/55 | 0.04222 | 1       | 0.0244   |
